# Supplementary material for: Moxifloxacin Liposomes: Effect of Liposome Preparation Method on Physicochemical Properties and Antimicrobial Activity against Staphylococcus epidermidis
Source: MDPI journal article supplement (doi:10.3390/pharmaceutics14020370), 2022-02-07
Supplement: s1 [file s1]

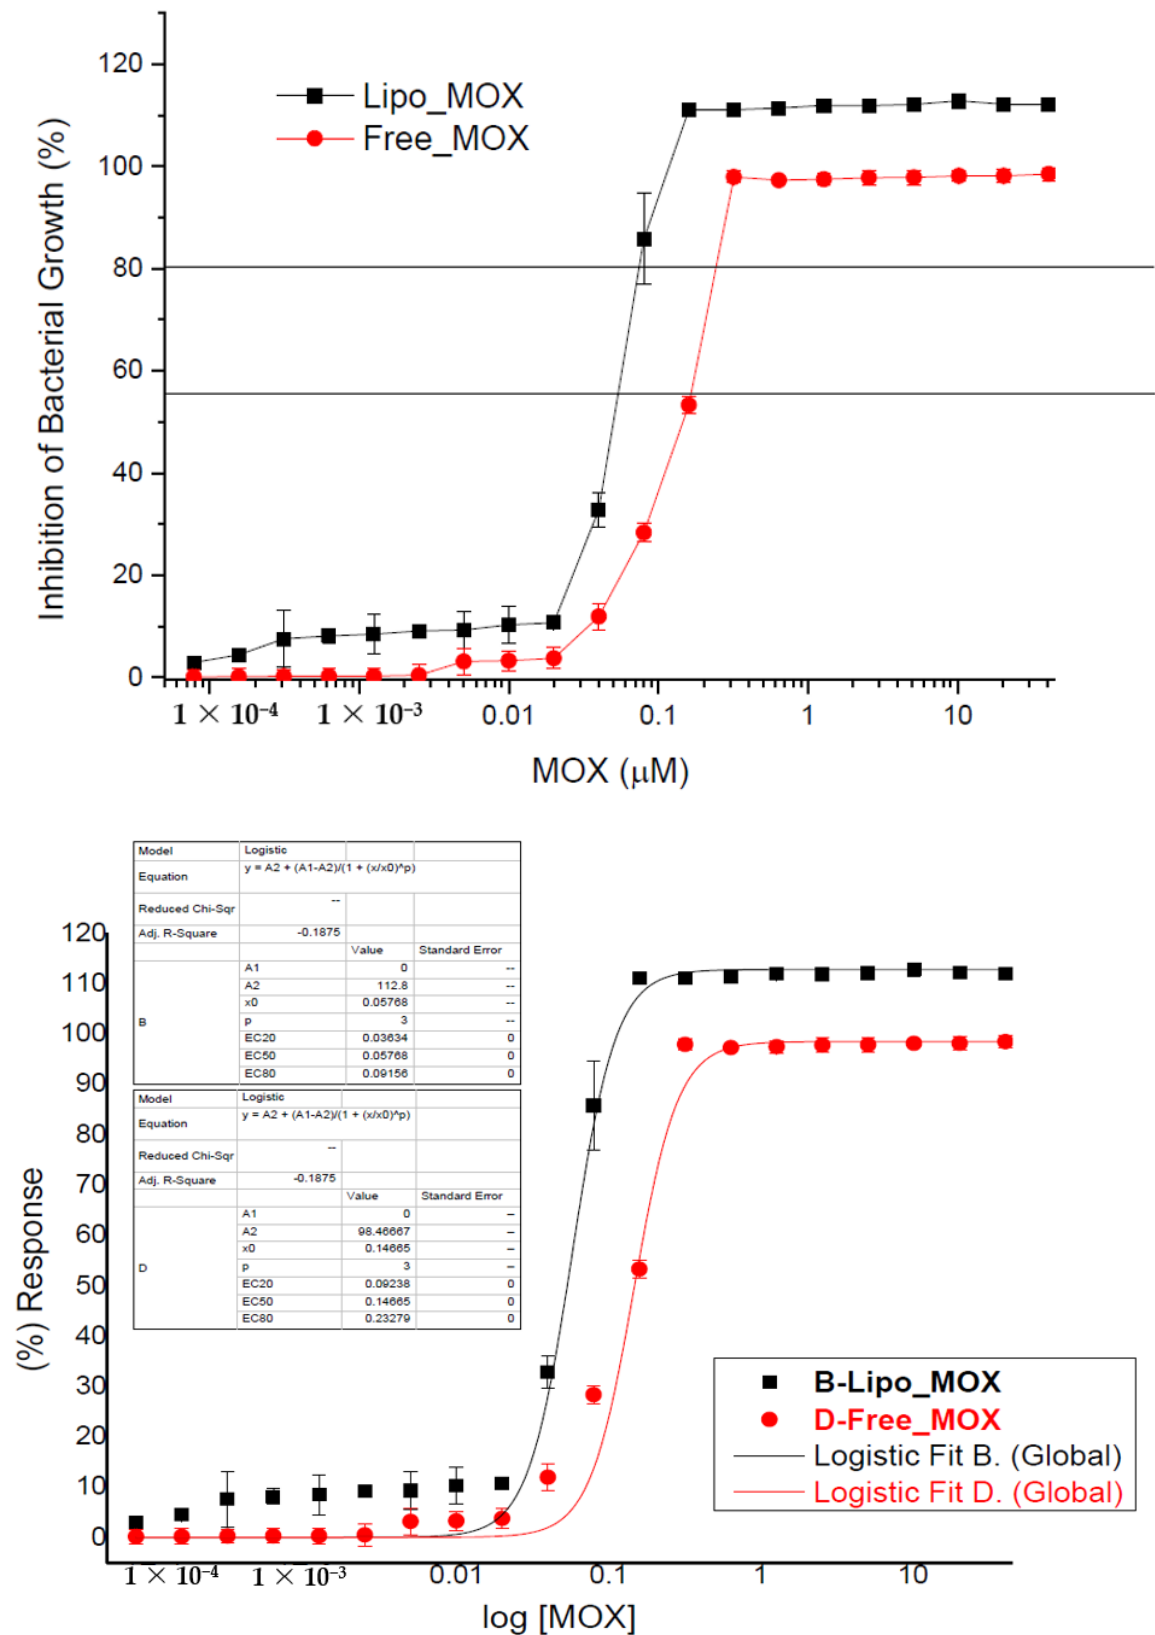

**Figure S3.** Calculation of MIC and MIC-50 of MOX towards *Staphylococcus epidermidis* (biofilm positive, ATCC 35984) (A) Graphical estimation. (B) Logistic Calculation.
