# Supplementary material for: Moxifloxacin Liposomes: Effect of Liposome Preparation Method on Physicochemical Properties and Antimicrobial Activity against Staphylococcus epidermidis
Source: MDPI journal article supplement (doi:10.3390/pharmaceutics14020370), 2022-02-07
Supplement: s1 [file s1]

**Supplementary Data for Paper *Moxifloxacin liposomes: Effect of liposome preparation method on physicochemical properties and antimicrobial activity***

**Figure S1.** Optimization of MOX remote loading in PC/Chol (1:1) liposomes

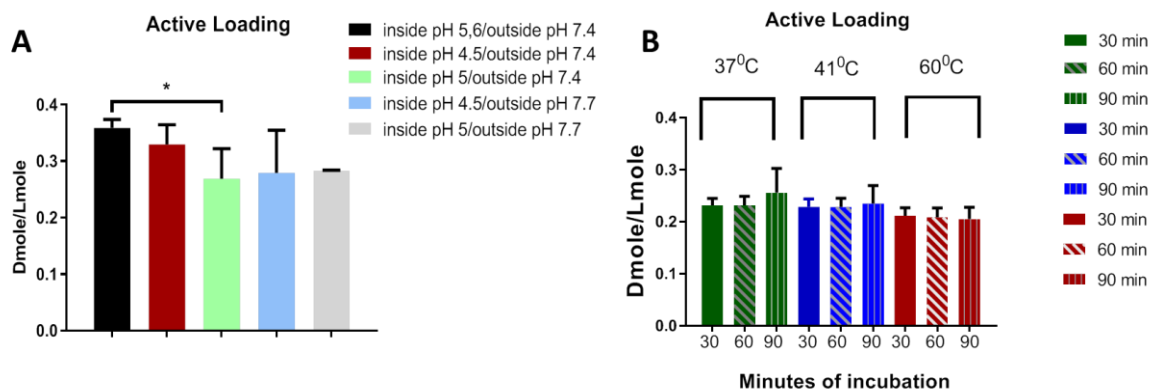

As seen from Figure S1A, the pH conditions that confer maximum loading of MOX in liposomes is  $(\text{NH}_4)_2\text{SO}_4$  pH 5.60 inside and PBS, pH 7.40 outside. MOX loading is not different in the different temperatures and incubation periods tested (37, 41 or 60°C, for 30, 60 or 90 min), as seen in the results presented in Fig.S1B.
