# Supplementary material for: Moxifloxacin Liposomes: Effect of Liposome Preparation Method on Physicochemical Properties and Antimicrobial Activity against Staphylococcus epidermidis
Source: MDPI journal article supplement (doi:10.3390/pharmaceutics14020370), 2022-02-07

**Supplementary Data for Paper *Moxifloxacin liposomes: Effect of liposome preparation method on physicochemical properties and antimicrobial activity***

**Figure S2.** Stability of liposomes during storage at 4 °C : A) Vesicle mean diameter measurements; B) Polydispersity Index (PDI) measurements; C)  $\zeta$ -potential values of the liposomes; D) Retention of MOX in various liposome types (lipid membrane composition).

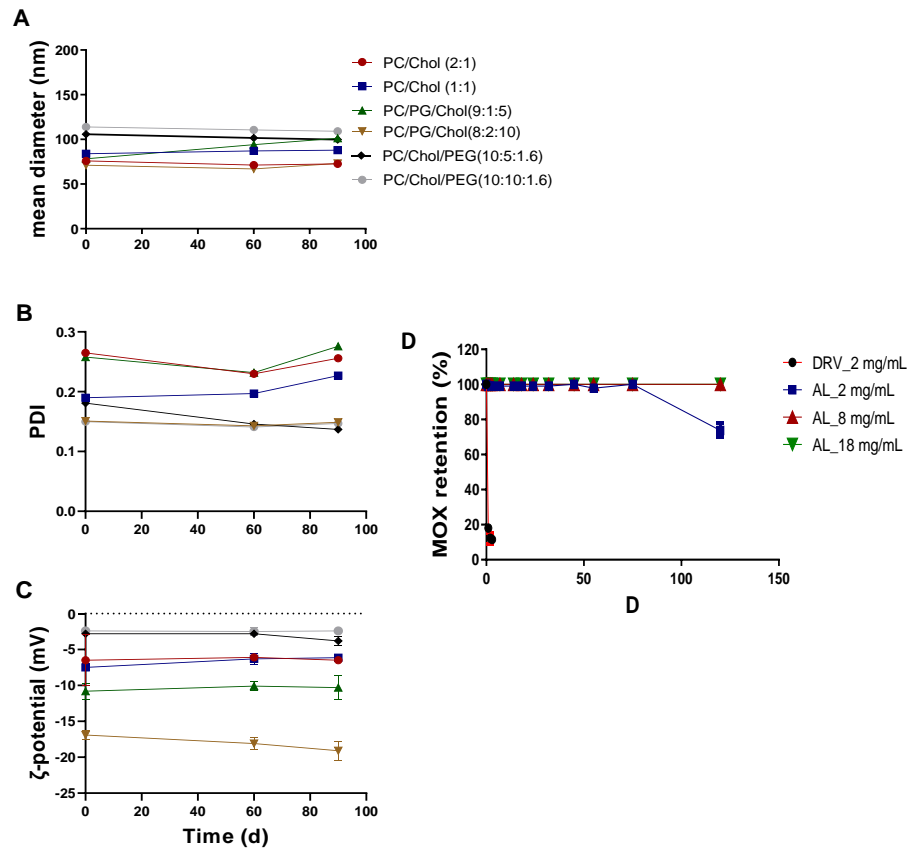

Supplement: s1 [file s1]
